# Supplementary material
Source: PubMed Central journal article supplement (PMC2919320)
Supplement: NIHMS203257-supplement-01.pdf [file NIHMS203257-supplement-01.pdf]

## Supplemental Information

### Initiation of the TORC1-Regulated G<sub>0</sub> Program Requires Igo1 and Igo2, which License Specific mRNAs to Bypass Degradation via the 5'-3' mRNA Decay Pathway

Nicolas Talarek, Elisabetta Cameroni, Malika Jaquenoud, Xuan Luo, Séverine Bontron, Soyeon Lippman, Geeta Devgan, Michael Snyder, James R. Broach, and Claudio De Virgilio

#### INVENTORY OF SUPPLEMENTAL INFORMATION

##### Supplemental Figures

###### Figure S1, related to Figure 3

Associations of Igo1 with Pbp1, Pbp4, Lsm12, and Dhh1 are Insensitive to RNase A Treatment

###### Figure S2, related to Figure 4

Igo1 and Igo2 Stabilize *HSP26-lacZ* mRNAs Following Inactivation of TORC1

###### Figure S3, related to Figure 5

The 5'-3' mRNA Decay Pathway Targets Specific mRNAs in *igo1Δ igo2Δ* Mutants

###### Figure S4, related to Figure 6

*HSP26* mRNA Fractionates with Polyribosomes on Sucrose Gradients in the Absence of Igo1/2

###### Figure S5, related to Figure 7

Relative distribution of *HSP26* mRNAs among cytoplasmic foci

##### Supplemental Tables

Table 1. Strains Used in This Study

Table 2. Plasmids Used in This Study

Table 3. Proteins Identified in Igo1-TAP and Igo1-myc<sub>13</sub> Pull-Down Experiments

##### Supplemental Experimental Procedures

Proteome Chip Analyses

Polysome Analyses

##### Supplemental References

## Supplemental Figures

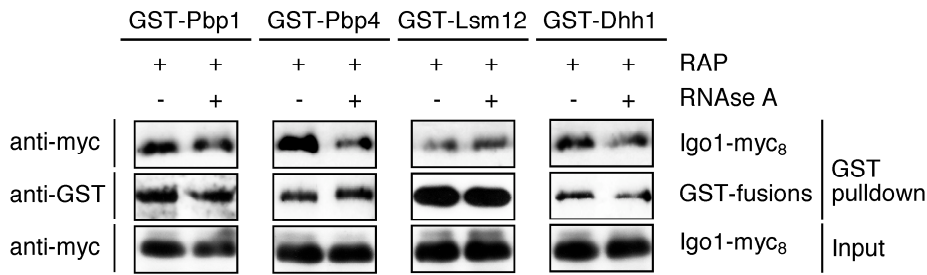

**Figure S1. Associations of Igo1 with Pbp1, Pbp4, Lsm12, and Dhh1 are Insensitive to RNase A Treatment**

GST-Pbp1, GST-Pbp4, GST-Lsm12, GST-Dhh1, and GST were pulled down from lysates obtained from rapamycin-treated (+ RAP; 0.2  $\mu\text{g ml}^{-1}$ ; 2 hr) wild-type strains co-expressing Igo1-myc<sub>8</sub>. Lysates were either treated (+) or not treated (-) with RNase A prior to the pull-down experiments. Cell lysates and GST pull-down samples were subjected to SDS-PAGE and immunoblots were probed with anti-myc or anti-GST antibodies.

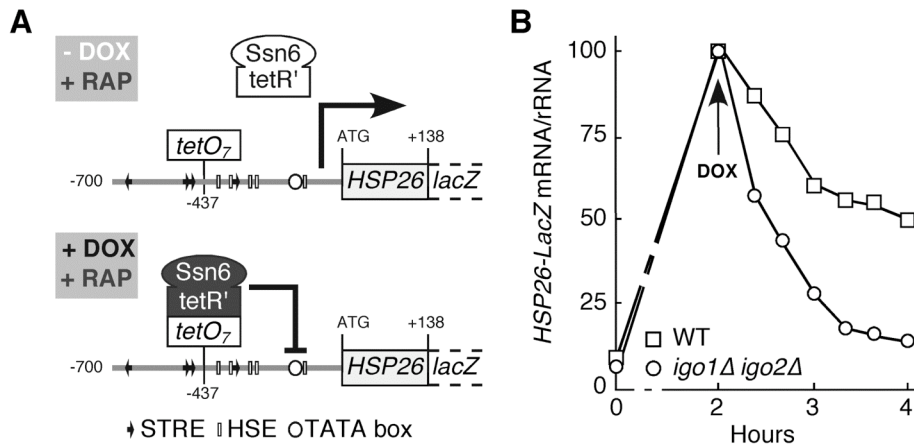

**Figure S2. Igo1 and Igo2 Stabilize *HSP26-lacZ* mRNAs Following Inactivation of TORC1**

(A) Schematic view of the *HSP26-lacZ* reporter gene (used in B) illustrating 700 nucleotides of the *HSP26* promoter region including the positions of the stress-response elements (STREs), the heat-shock-elements (HSEs; Chen and Pederson, 1993), and the inserted seven doxycycline-responsive *tetO* elements (*tetO*<sub>7</sub>). Nucleotide +138 of *HSP26* is fused to the *lacZ* gene. Doxycycline treatment triggers binding of the chimeric tetR'-Ssn6 fusion protein to the *tetO*<sub>7</sub> region and consequently mediates transcriptional repression of the reporter gene.

(B) Exponentially growing wild-type (□) and *igo1Δ igo2Δ* (○) cells harboring the doxycycline-repressible reporter and expressing the chimeric tetR'-Ssn6 protein were treated with rapamycin (0.2  $\mu\text{g ml}^{-1}$ ) at time 0. After 2 hr, cells were treated with doxycycline (DOX; 15  $\mu\text{g ml}^{-1}$ ) and grown for additional 2 hr in the continuous presence of rapamycin. *HSP26-lacZ* transcript levels were determined via northern blot analysis, quantified by PhosphorImager analysis, and expressed as relative level of *HSP26-lacZ* mRNA per rRNA (arbitrarily set to 100% for both strains for the values at the 2 hr time point of the rapamycin treatment; the relative *HSP26-lacZ* transcript levels were 3-fold higher in wild-type than in *igo1Δ igo2Δ* cells at this time point). In control experiments, addition of doxycycline prior to the rapamycin treatment fully abolished the *HSP26-lacZ* induction in wild-type and *igo1Δ igo2Δ* cells (not shown). The calculated half live of the *HSP26-lacZ* mRNA was 104 min ( $\pm 7$  SD; n = 3) and 36 min ( $\pm 4$  SD; n = 3) in rapamycin-treated wild-type and *igo1Δ igo2Δ* cells, respectively.

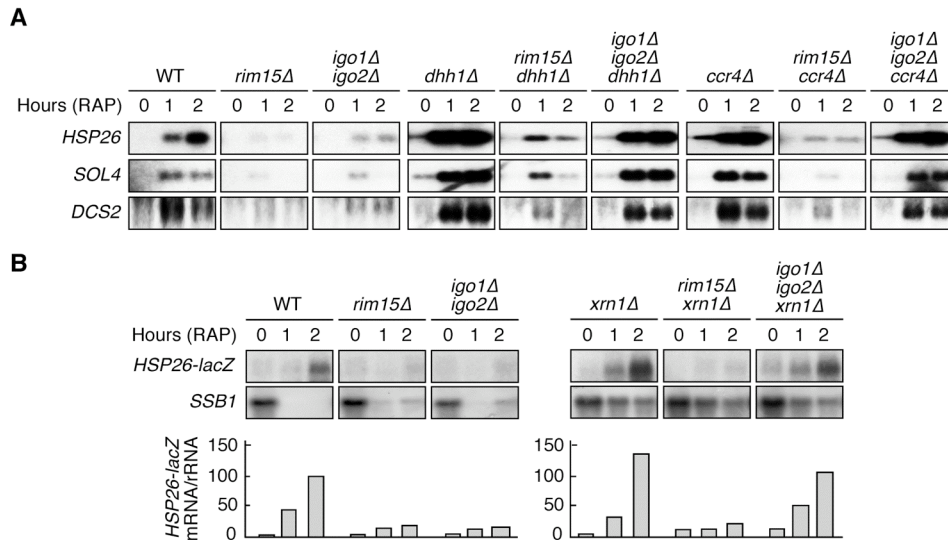

**Figure S3. The 5'-3' mRNA Decay Pathway Targets Specific mRNAs in *igo1Δ igo2Δ* Mutants**

(A) Loss of Dhh1 or Ccr4 suppresses the defect of *igo1Δ igo2Δ*, but not that of *rim15Δ* cells, in rapamycin-induced *HSP26*, *SOL4*, and *DCS2* mRNA expression. Transcript levels were determined by northern blot analysis in wild-type (WT) and mutant strains prior to (0) and following a 1-hr or 2-hr rapamycin treatment (RAP; 0.2  $\mu\text{g ml}^{-1}$ ).

(B) *HSP26-LacZ* transcript levels prior to and following rapamycin treatment. Transcript levels of *HSP26-lacZ* and *SSB1* were determined by northern blot analysis in wild-type (WT) and indicated mutant strains prior to (0) and following a rapamycin treatment (RAP; 0.2  $\mu\text{g ml}^{-1}$ ) of 1 hr or 2 hr. Bar graphs show the relative level of *HSP26-lacZ* mRNA per rRNA (arbitrarily set to 1.0 for exponentially growing wild-type cells).

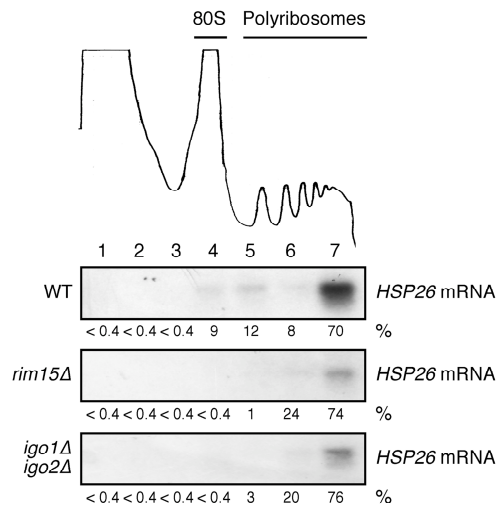

**Figure S4. *HSP26* mRNA Fractionates with Polyribosomes on Sucrose Gradients in the Absence of Igo1/2**

The top trace shows the UV absorbance profile at 254 nm of a cell extract of rapamycin-treated (2 hr; 0.2  $\mu\text{g ml}^{-1}$ ) wild-type yeast after sedimentation on a 7 to 50 % linear sucrose gradient. Nearly identical profiles were obtained from *rim15Δ* and *igo1Δ igo2Δ* cell extracts (not shown). Aligned below are northern blots performed on total RNA isolated from the indicated (1-7) sucrose gradient fractions of wild-type (WT), *rim15Δ*, and *igo1Δ igo2Δ* cell extracts (all harvested after a 2-hr rapamycin treatment). The relative levels of *HSP26* input mRNA (set to 100% for wild-type cells) were 18% and 32% for *rim15Δ* and *igo1Δ igo2Δ* cells, respectively. The positions of the 80S monosomes and polyribosomes are indicated. *HSP26* mRNA was quantified by PhosphorImager analysis and the percentage of *HSP26* mRNA in the indicated sucrose gradient fractions is indicated at the bottom of each panel.

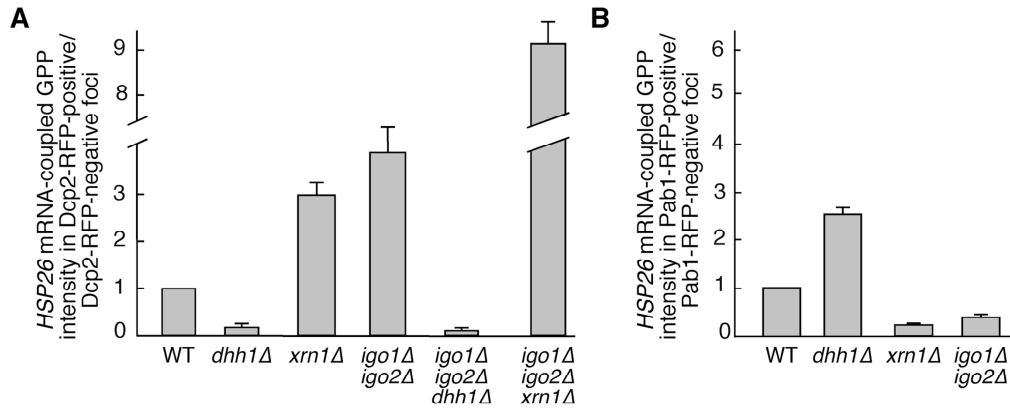

**Figure S5. Relative Distribution of *HSP26* mRNAs Among Cytoplasmic Foci**

(A, B) Wild-type (WT) and indicated mutant strains co-expressing the PB-marker protein Dcp2-RFP (A) or the EGPB/SG-marker protein Pab1-RFP (B), as well as *HSP26-U1A* mRNA and the U1A-GFP binding protein were harvested following glucose limitation (*i.e.* following growth for 48 hr in batch cultures). Bars represent (in a total of 100 cells) the ratio between the intensity of *HSP26* mRNA-coupled GFP signal in cytoplasmic foci that co-stained with Dcp2-RFP (A) or Pab1-RFP (B) and that detected in foci devoid of the corresponding RFP signal. This ratio was set to 1.0 for wild-type cells. Data represent averages ( $n = 3$ ), with SDs indicated by the lines above each bar. The GFP signal in each *HSP26* mRNA-containing cytoplasmic focus was calculated as the mean intensity within the region of the focus multiplied by its area, after subtraction of the mean background intensity of a nearby area of comparable size. Within an experiment, exposure settings were identical. Notably, loss of Xrn1, like loss of Igo1/2, strongly shifted the relative distribution of *HSP26* mRNAs among cytoplasmic foci towards Dcp2-RFP-positive PBs and the effects of loss of both Igo1/2 and of Xrn1 appeared to be additive (A). As expected, loss of Dhh1 enhanced, while loss of Xrn1 or of Igo1/2 reduced, the relative amount of *HSP26* mRNAs in Pab1-RFP-positive EGPs/SGs (B).

## Supplemental Tables

**Table 1. Strains Used in This Study**

| Strain      | Genotype                                                                                                                                                      | Source                     | Figure/Table                                           |
|-------------|---------------------------------------------------------------------------------------------------------------------------------------------------------------|----------------------------|--------------------------------------------------------|
| BY4741      | MAT $\alpha$ ; <i>his3<math>\Delta</math>1</i> , <i>leu2<math>\Delta</math>0</i> , <i>met15<math>\Delta</math>0</i> , <i>ura3<math>\Delta</math>0</i>         | Euroscarf                  | 1B, E, F, 2A, C, D, 4, 5A-C, 6A-D, S3, S4, S5A, Table3 |
| BY4742      | MAT $\alpha$ ; <i>his3<math>\Delta</math>1</i> , <i>leu2<math>\Delta</math>0</i> , <i>lys2<math>\Delta</math>0</i> , <i>ura3<math>\Delta</math>0</i>          | Euroscarf                  |                                                        |
| YFL033C     | MAT $\alpha$ ; <i>rim15<math>\Delta</math>::kanMX4</i> [BY4741]                                                                                               | Euroscarf                  | 1E, F, 2A, C, D, 5A-C, 6B-D, S3, S4                    |
| YNL157W     | MAT $\alpha$ ; <i>igo1<math>\Delta</math>::kanMX4</i> [BY4741]                                                                                                | Euroscarf                  | 2A, C, D, 3B, 7A, C, S1                                |
| YHR132W-A   | MAT $\alpha$ ; <i>igo2<math>\Delta</math>::kanMX4</i> [BY4741]                                                                                                | Euroscarf                  | 2A, C, D                                               |
| CDV288-12A  | MAT $\alpha$ ; <i>igo1<math>\Delta</math>::kanMX4</i> , <i>igo2<math>\Delta</math>::kanMX4</i> [BY4741]                                                       | This study                 | 2A, C, D, 4, 5A-C, 6B-D, S3, S4, S5A                   |
| LC54        | MAT $\alpha$ ; <i>IGO1-myc<sub>13</sub>::kanMX4</i> [BY4741]                                                                                                  | This study                 | 3A, Table 3                                            |
| MJA1709-8B  | MAT $\alpha$ ; <i>rim15<math>\Delta</math>::kanMX4</i> <i>IGO1-myc<sub>13</sub>::kanMX4</i> [BY4741]                                                          | This study                 | 3A                                                     |
| NT255-1B    | MAT $\alpha$ ; <i>leu2<math>\Delta</math>0::LEU2-TetR'-SSN6</i> [BY4741/2]                                                                                    | This study                 | S2B                                                    |
| NT280-12D   | MAT $\alpha$ ; <i>leu2<math>\Delta</math>0::LEU2-TetR'-SSN6</i> <i>igo1<math>\Delta</math>::kanMX4</i> , <i>igo2<math>\Delta</math>::kanMX4</i> [BY4741/2]    | This study                 | S2B                                                    |
| YDL160C     | MAT $\alpha$ ; <i>dhh1<math>\Delta</math>::kanMX4</i> [BY4741]                                                                                                | Euroscarf                  | 5A-C, S3A, S5A                                         |
| YAL021C     | MAT $\alpha$ ; <i>ccr4<math>\Delta</math>::kanMX4</i> [BY4741]                                                                                                | Euroscarf                  | 5A-C, S3A                                              |
| NT205-1B    | MAT $\alpha$ ; <i>xrn1<math>\Delta</math>::kanMX4</i> [BY4741/2]                                                                                              | This study                 | 5A-C, 6B-D, S3B, S5A                                   |
| MJA1602-3A  | MAT $\alpha$ ; <i>rim15<math>\Delta</math>::kanMX4</i> , <i>dhh1<math>\Delta</math>::kanMX4</i> [BY4741/2]                                                    | This study                 | 5A-C, S3A                                              |
| MJA1600-10B | MAT $\alpha$ ; <i>rim15<math>\Delta</math>::kanMX4</i> , <i>ccr4<math>\Delta</math>::kanMX4</i> [BY4741/2]                                                    | This study                 | 5A-C, S3A                                              |
| MJA1621-10B | MAT $\alpha$ ; <i>igo1<math>\Delta</math>::kanMX4</i> , <i>igo2<math>\Delta</math>::kanMX4</i> , <i>dhh1<math>\Delta</math>::kanMX4</i> [BY4741/2]            | This study                 | 5A-C, S3A, S5A                                         |
| MJA1597-4D  | MAT $\alpha$ ; <i>igo1<math>\Delta</math>::kanMX4</i> , <i>igo2<math>\Delta</math>::kanMX4</i> , <i>ccr4<math>\Delta</math>::kanMX4</i> [BY4741/2]            | This study                 | 5A-C, S3A                                              |
| NT205-1A    | MAT $\alpha$ ; <i>rim15<math>\Delta</math>::kanMX4</i> , <i>xrn1<math>\Delta</math>::kanMX4</i> [BY4741/2]                                                    | This study                 | 5A-C, 6B-D, S3B                                        |
| NT206-7A    | MAT $\alpha$ ; <i>igo1<math>\Delta</math>::kanMX4</i> , <i>igo2<math>\Delta</math>::kanMX4</i> , <i>xrn1<math>\Delta</math>::kanMX4</i> [BY4741/2]            | This study                 | 5A-C, 6B-D, S3B, S5A                                   |
| Y2864       | MAT $\alpha$ ; <i>gal1<math>\Delta</math>::HIS3</i> , <i>ade2-1</i> , <i>his3-11,15</i> , <i>leu2-3,112</i> , <i>trp1-1</i> , <i>ura3-1</i> , <i>can1-100</i> | Wang <i>et al.</i> , 2004  | 2B                                                     |
| CDV314      | MAT $\alpha$ ; <i>rim15<math>\Delta</math>::kanMX4</i> [Y2864]                                                                                                | This study                 | 2B                                                     |
| CDV308-1B   | MAT $\alpha$ ; <i>igo1<math>\Delta</math>::kanMX4</i> , <i>igo2<math>\Delta</math>::kanMX4</i> [Y2864]                                                        | This study                 | 2B                                                     |
| yMK1344     | MAT $\alpha$ ; <i>his3-11, 15</i> , <i>leu2-3, 112</i> , <i>trp1-1</i> , <i>ura3-1</i> , <i>DCPI-GFP::G418</i> , <i>PAB1-RFP::NAT</i>                         | Hoyle <i>et al.</i> , 2007 |                                                        |
| NT253-13B   | MAT $\alpha$ ; <i>igo1<math>\Delta</math>::kanMX4</i> , <i>PAB1-RFP::NAT</i> [BY4741/2]                                                                       | This study                 | 7B                                                     |
| NT169-9C    | MAT $\alpha$ ; <i>PAB1-RFP::NAT</i> [BY4741/2]                                                                                                                | This study                 | 7D, S5B                                                |
| NT255-6B    | MAT $\alpha$ ; <i>igo1<math>\Delta</math>::kanMX4</i> , <i>igo2<math>\Delta</math>::kanMX4</i> , <i>PAB1-RFP::NAT</i> [BY4741/2]                              | This study                 | S5B                                                    |
| NT298       | MAT $\alpha$ ; <i>dhh1<math>\Delta</math>::kanMX4</i> , <i>PAB1-RFP::NAT</i> [BY4741/2]                                                                       | This study                 | S5B                                                    |
| NT301       | MAT $\alpha$ ; <i>xrn1<math>\Delta</math>::kanMX4</i> , <i>PAB1-RFP::NAT</i> [BY4741/2]                                                                       | This study                 | S5B                                                    |

**Table 2. Plasmids Used in This Study**

| <b>Plasmid</b>   | <b>Description</b>                                                | <b>Source</b>                 | <b>Figure/Table</b> |
|------------------|-------------------------------------------------------------------|-------------------------------|---------------------|
| YEplac181        | 2 $\mu$ , <i>LEU2</i>                                             | Gietz and Sugino, 1988        |                     |
| pCDV1157         | [YEplac181] <i>TDH3p-IGO1-HA<sub>3</sub></i>                      | This study                    | 1B                  |
| pCDV1159         | [YEplac181] <i>TDH3p-SIR4-HA<sub>3</sub></i>                      | This study                    | 1B                  |
| YEplac195        | 2 $\mu$ , <i>URA3</i>                                             | Gietz and Sugino, 1988        |                     |
| pNB566           | [YEplac195] <i>GAL1p-GST-RIM15</i>                                | Wanke <i>et al.</i> , 2005    | 1B                  |
| pLC803           | [YEplac195] <i>GAL1p-GST</i>                                      | This study                    | 1B                  |
| pCDV487          | [YEplac195] <i>GAL1p-GST-RIM15-HA<sub>3</sub></i>                 | Pedruzzi <i>et al.</i> , 2003 | 1B,C, D             |
| pIP779           | [YEplac195] <i>GAL1p-GST-RIM15<sup>K823Y</sup>-HA<sub>3</sub></i> | This study                    | 1C, D               |
| pGEX3            | <i>GST</i>                                                        | Smith and Johnson, 1988       | 1C                  |
| pLC1092          | [pGEX3] <i>GST-IGO1</i>                                           | This study                    | 1C, D               |
| pLC1134          | [pGEX3] <i>GST-IGO1<sup>S64A</sup></i>                            | This study                    | 1C                  |
| pVW1109          | [pGEX3] <i>GST-IGO2</i>                                           | This study                    | 1C                  |
| MJA1497          | [pGEX3] <i>GST-ENSA</i>                                           | This study                    | 1C                  |
| MJA1498          | [pGEX3] <i>GST-ARPP-19</i>                                        | This study                    | 1C                  |
| YCplac33         | CEN, <i>URA3</i>                                                  | Gietz and Sugino, 1988        | 2D                  |
| pBG1805-IGO1-TAP | <i>GAL1p-IGO1-HA-6HIS-3C-ZZ</i>                                   | Gelperin <i>et al.</i> , 2005 | Table 3             |
| pLC1427          | [YCplac33] <i>IGO1-myc<sub>8</sub></i>                            | This study                    | 2D, 3B, S1          |
| pLC1430          | [YCplac33] <i>IGO1<sup>S64A</sup>-myc<sub>8</sub></i>             | This study                    | 2D, 3B              |
| pLC1429          | [YCplac33] <i>IGO2-myc<sub>8</sub></i>                            | This study                    | 2D                  |
| pMJA1481         | [YEplac195] <i>IGO1p-ENSA-myc<sub>8</sub></i>                     | This study                    | 2D                  |
| pMJA1482         | [YEplac195] <i>IGO1p-ARPP-19-myc<sub>8</sub></i>                  | This study                    | 2D                  |
| pUKC414          | CEN, <i>URA3, HSP26-lacZ</i>                                      | Ferreira <i>et al.</i> , 2001 | 5C, 6C              |
| pXL1633          | CEN, <i>HIS3, HSP26-lacZ</i>                                      | This study                    | 2D                  |
| pCDV1082         | YCpIF2- <i>ADH1p-GST</i>                                          | This study                    | 3A, B, S1           |
| pMJA1655         | YCpIF2- <i>ADH1p-GST-PBP4</i>                                     | This study                    | 3A, B, S1           |
| pMJA1654         | YCpIF2- <i>ADH1p-GST-PBP1</i>                                     | This study                    | 3A, B, S1           |
| pMJA1656         | YCpIF2- <i>ADH1p-GST-DHH1</i>                                     | This study                    | 3A, B, S1           |
| pMJA1657         | YCpIF2- <i>ADH1p-GST-LSM12</i>                                    | This study                    | 3A, B, S1           |
| pCM242           | CMVp( <i>tetR<sup>r</sup>-SSN6</i> ): <i>LEU2</i>                 | Belli <i>et al.</i> , 1998    | S2B                 |
| pNT012           | CEN, <i>URA3, HSP26p::tetO<sub>7</sub>-HSP26-LacZ</i>             | This study                    | S2A, B              |
| pTG003           | PRS315- <i>DCP2-RFP</i>                                           | Gill <i>et al.</i> , 2006     | 6A, D, 7A, S5A      |
| pPS2037          | PRS416- <i>PGK1p-PGK1-U1A-PGK1</i> 3'UTR                          | Brodsky and Silver, 2000      |                     |
| pNT003           | PRS416- <i>HSP26p-HSP26-U1A-HSP26</i> 3'UTR                       | This study                    | 6A, D, 7C, D, S5    |
| pPS2045          | PRS313- <i>GALp-U1A(1-94)-GFP</i>                                 | Brodsky and Silver, 2000      |                     |
| pNT004           | PRS413- <i>ADH1p-U1A(1-94)-GFP</i>                                | This study                    | 6A, D, 7C, D, S5    |
| pXL1632          | [YCplac33] <i>IGO1-GFP</i>                                        | This study                    | 7A, B               |
| pNT005           | [YCplac33] <i>IGO1-RFP</i>                                        | This study                    | 7C                  |

**Table 3. Proteins Identified in Igo1-TAP and Igo1-myc<sub>13</sub> Pull-Down Experiments**

| Protein <sup>1</sup> | Igo1-TAP | Igo1-myc <sub>13</sub> | MW    | Function/Description                                                       |
|----------------------|----------|------------------------|-------|----------------------------------------------------------------------------|
| Act1                 |          | ✓                      | 41.7  | Actin                                                                      |
| Ate1                 | ✓        |                        | 57.9  | Arginyl-tRNA-protein transferase                                           |
| Clu1                 | ✓        |                        | 145.2 | Component of eIF3                                                          |
| Hhf1/2               |          | ✓                      | 11.4  | Histone H4                                                                 |
| Hrk1                 | ✓        |                        | 85.7  | Protein kinase implicated in activation of Pma1                            |
| Hsc82                |          | ✓                      | 80.9  | Cytoplasmic chaperone of the Hsp90 family                                  |
| Htb1                 |          | ✓                      | 14.3  | Histone H2B                                                                |
| <b>Igo1</b>          | ✓        | ✓                      | 18.0  | Required for initiation of G <sub>0</sub> ; target of Rim15 protein kinase |
| Ilv6                 | ✓        |                        | 34.0  | Regulatory subunit of acetolactate synthase                                |
| <b>Lsm12</b>         | ✓        | ✓                      | 21.3  | Sm-like protein; interacts with Pbp1/4; associates with ribosomes          |
| Mot2                 | ✓        |                        | 65.4  | Subunit of the CCR4-NOT complex                                            |
| <b>Pbp1</b>          | ✓        | ✓                      | 78.8  | Interacts with Pab1 to regulate mRNA polyadenylation                       |
| <b>Pbp4</b>          | ✓        | ✓                      | 19.9  | Pbp1p binding protein 4; interacts with Lsm12                              |
| Por1                 |          | ✓                      | 30.4  | Mitochondrial porin, outer membrane protein                                |
| Psp2                 | ✓        |                        | 65.6  | Possible role in mitochondrial mRNA splicing                               |
| Rim1                 |          | ✓                      | 15.4  | Role in mitochondrial DNA replication; binds single-stranded DNA           |
| Rps18A               |          | ✓                      | 17.0  | Protein component of the small (40S) ribosomal subunit                     |
| Rsp5                 | ✓        |                        | 91.8  | E3 ubiquitin-protein ligase                                                |
| Sec23                | ✓        |                        | 85.4  | GTPase-activating protein; involved in ER to Golgi transport               |
| Sfp1                 | ✓        |                        | 74.8  | Transcription factor controlling expression of Ribi genes                  |
| <b>Ssa1/2</b>        | ✓        | ✓                      | 69.6  | Hsp70 family member                                                        |
| Ssa4                 |          | ✓                      | 69.7  | Hsp70 family member                                                        |
| <b>Ssb1/2</b>        | ✓        | ✓                      | 66.6  | Hsp70 family member; ribosome-associated molecular chaperone               |
| Ssc1                 | ✓        |                        | 70.6  | Hsp70 family member; role in mitochondrial protein import                  |
| Tef1                 |          | ✓                      | 50.0  | Translational elongation factor EF-1 $\alpha$                              |

<sup>1</sup>Proteins were identified by LC-MS-MS analysis of polypeptides in purified Igo1-TAP and Igo1-myc<sub>13</sub> preparations (see Experimental Procedures). Only proteins for which at least four peptides were identified and, in the case of Igo1-TAP, for which the number of identified peptides was also at least four times higher than the number of peptides recovered with an unrelated control (Gtr1-TAP) were included in the list. The preparations (*i.e.* Igo1-TAP and/or Igo1-myc<sub>13</sub>) in which corresponding peptides were identified are indicated (✓). Proteins for which peptides were recovered in both Igo1-TAP and Igo1-myc<sub>13</sub> preparations are highlighted in bold.

## Supplemental Experimental Procedures

### Proteome Chip Analyses

Yeast proteome microarrays were prepared as previously described (Ptacek et al., 2005). Approximately 4400 GST::His-tagged yeast proteins were overexpressed and purified by affinity chromatography and spotted in duplicate on a surface-modified microscope slide. The autophosphorylating kinases Pka2, Pkc-a and Cmk1 were added at defined locations to serve as both positive controls and landmarks for the identification of phosphorylation signals on the array. Common kinase substrates, such as myelin basic protein (MBP), histone H1, casein, polyGlu-Tyr, and a carboxyterminal domain (CTD) peptide containing three copies of the acidic CTD of RNA polymerase II were also included to exhibit the addition of kinase activity on the array.

To determine the optimal amount of kinase to use for probing the proteome arrays, a dilution series (1:1, 1:2, 1:5, 1:10, and 1:20) of wild-type Rim15 and kinase-inactive Rim15<sup>KD</sup> was made in a total volume of 200  $\mu$ l kinase buffer containing 2  $\mu$ l [ $\gamma$ -<sup>33</sup>P] ATP and added to test arrays containing positive controls and common kinase substrates as described (Ptacek et al., 2005). Using the optimized conditions, proteome arrays were probed in duplicate with wild-type Rim15 and Rim15<sup>KD</sup> in 200  $\mu$ l kinase buffer containing 2  $\mu$ l [ $\gamma$ -<sup>33</sup>P]ATP in a humidified chamber at 30°C for 1 hr. Arrays were then exposed to X-ray film for 1, 3 and 7 days. Data analysis was performed as described previously (Ptacek et al., 2005). In short, substrate proteins that displayed reproducible signals higher than those of neighboring spots in at least three of the four spots were identified and then compared to the autophosphorylation control. Only those spots that were specifically phosphorylated in the presence of wild-type Rim15 were scored as positive substrates. The proteome arrays probed with Rim15<sup>KD</sup> exhibited signals identical to those obtained in the absence of protein kinase.

### Polysome Analyses

Strains were grown in synthetic defined medium to mid-log phase and either treated, or not, with rapamycin for 2 hr. Cycloheximide (0.1 mg ml<sup>-1</sup> final concentration) was added just prior to harvesting. Extracts (of 150 OD<sub>600</sub> of yeast cultures) were layered onto 7-50% linear sucrose gradients and centrifuged at 35'000 rpm at 4°C for 210 min. Gradient analysis was performed using an ISCO UA-6 collector with continuous monitoring at A<sub>254nm</sub>. Manually collected fractions were used for RNA extraction as described (Gaillard and Aguilera, 2008).



## Supplemental References

Belli, G., Gari, E., Piedrafita, L., Aldea, M., and Herrero, E. (1998). An activator/repressor dual system allows tight tetracycline-regulated gene expression in budding yeast. *Nucleic. Acids Res.* *26*, 942-947.

Brodsky, A.S., and Silver, P.A. (2000). Pre-mRNA processing factors are required for nuclear export. *RNA* *6*, 1737-1749.

Chen, J., and Pederson, D.S. (1993). A distal heat shock element promotes the rapid response to heat shock of the *HSP26* gene in the yeast *Saccharomyces cerevisiae*. *J. Biol. Chem.* *268*, 7442-7448.

Ferreira, P.C., Ness, F., Edwards, S.R., Cox, B.S., and Tuite, M.F. (2001). The elimination of the yeast [*PSI*<sup>+</sup>] prion by guanidine hydrochloride is the result of Hsp104 inactivation. *Mol. Microbiol.* *40*, 1357-1369.

Gaillard, H., and Aguilera, A. (2008). A novel class of mRNA-containing cytoplasmic granules are produced in response to UV-irradiation. *Mol. Biol. Cell* *19*, 4980-4992.

Gietz, R.D., and Sugino, A. (1988). New yeast-*Escherichia coli* shuttle vectors constructed with *in vitro* mutagenized yeast genes lacking six-base pair restriction sites. *Gene* *74*, 527-534.

Gill, T., Aulds, J., and Schmitt, M.E. (2006). A specialized processing body that is temporally and asymmetrically regulated during the cell cycle in *Saccharomyces cerevisiae*. *J. Cell Biol.* *173*, 35-45.

Hoyle, N.P., Castelli, L.M., Campbell, S.G., Holmes, L.E., and Ashe, M.P. (2007). Stress-dependent relocalization of translationally primed mRNPs to cytoplasmic granules that are kinetically and spatially distinct from P-bodies. *J. Cell Biol.* *179*, 65-74.

Pedruzzi, I., Dubouloz, F., Cameroni, E., Wanke, V., Roosen, J., Winderickx, J., and De Virgilio, C. (2003). TOR and PKA signaling pathways converge on the protein kinase Rim15 to control entry into G<sub>0</sub>. *Mol. Cell* *12*, 1607-1613.

Ptacek, J., Devgan, G., Michaud, G., Zhu, H., Zhu, X., Fasolo, J., Guo, H., Jona, G., Breitkreutz, A., Sopko, R., et al. (2005). Global analysis of protein phosphorylation in yeast. *Nature* *438*, 679-684.

Smith, D.B., and Johnson, K.S. (1988). Single-step purification of polypeptides expressed in *Escherichia coli* as fusions with glutathione *S*-transferase. *Gene* *67*, 31-40.

Wang, Y., Pierce, M., Schnepfer, L., Guldal, C.G., Zhang, X., Tavazoie, S., and Broach, J.R. (2004). Ras and Gpa2 mediate one branch of a redundant glucose signaling pathway in yeast. *PLoS Biol.* *2*, E128.

Wanke, V., Pedruzzi, I., Cameroni, E., Dubouloz, F., and De Virgilio, C. (2005). Regulation of G<sub>0</sub> entry by the Pho80-Pho85 cyclin-CDK complex. *EMBO J.* *24*, 4271-4278.
